# Supplementary material for: The effect of the 2-week wait referral system on the detection of and mortality from colorectal cancer: protocol of a systematic review and meta-analysis
Source: PubMed Central journal article supplement (PMC5081696; doi:10.1186/s13643-016-0358-6), 2016-10-26
Supplement: 13643_2016_358_MOESM3_ESM.pdf [file 13643_2016_358_MOESM3_ESM.pdf]

## Additional file 3

### Search strategies for Pubmed MEDLINE

1. [{"Referral and Consultation"[Mesh]}] AND "Neoplasms"[Mesh] AND "Waiting Lists"[Mesh]
2. [{"fast track OR rapid OR urgent"}] AND [{"Referral and Consultation"[Mesh]}] AND "Neoplasms"[Mesh]
3. [{"outcomes OR survival OR diagnosis OR detection"}] AND [{"gastrointestinal OR colorectal OR oesophageal OR stomach OR duodenal OR bowel OR rectal OR CRC"}] AND [{"TWW OR 2WW OR two week wait OR rapid access OR fast track OR urgent referral"}] AND cancer
