# Supplementary material for: The effect of the 2-week wait referral system on the detection of and mortality from colorectal cancer: protocol of a systematic review and meta-analysis
Source: PubMed Central journal article supplement (PMC5081696; doi:10.1186/s13643-016-0358-6), 2016-10-26
Supplement: 13643_2016_358_MOESM4_ESM.pdf [file 13643_2016_358_MOESM4_ESM.pdf]

**Additional file 4**

**Table S1. Data extraction sheet sample**

|                                                                                                                                                                                                                                                                                                                                            |
|--------------------------------------------------------------------------------------------------------------------------------------------------------------------------------------------------------------------------------------------------------------------------------------------------------------------------------------------|
| <b>Study details</b>                                                                                                                                                                                                                                                                                                                       |
| <p><b>First author surname year of publication:</b></p> <p><b>Country:</b></p> <p><b>Study design:</b></p> <p><b>Study setting</b> [primary care/specialty clinic/other - specify]:</p> <p><b>Number of centres:</b></p> <p><b>Total length of follow up:</b></p> <p><b>Funding</b> [government/private/manufacturer/other - specify]:</p> |
| <b>Aim of the study</b>                                                                                                                                                                                                                                                                                                                    |
| <b>Participants</b>                                                                                                                                                                                                                                                                                                                        |
| <p><b>Recruitment dates:</b></p> <p><b>Sample size:</b></p> <p><b>Inclusion criteria:</b></p> <p><b>Exclusion criteria:</b></p> <p><b>Characteristics of participants [total study sample]</b></p> <p>Mean [range or SD] age [years]:</p> <p>Women [n [%]]:</p> <p>Race/ethnicity [n [%]]:</p>                                             |
| <b>Intervention</b>                                                                                                                                                                                                                                                                                                                        |
| <p><b>TWW referral group:</b></p> <p><b>Intervention 2 group:</b></p> <p><b>Intervention 3 group:</b></p>                                                                                                                                                                                                                                  |
| <b>Outcomes [study-based]</b>                                                                                                                                                                                                                                                                                                              |

|                                                                                                                       |                           |                             |                             |
|-----------------------------------------------------------------------------------------------------------------------|---------------------------|-----------------------------|-----------------------------|
| <b>Primary outcomes</b> <i>[list]</i> :                                                                               |                           |                             |                             |
| <b>Secondary outcomes</b> <i>[list]</i> :                                                                             |                           |                             |                             |
| <b>Number of patients</b>                                                                                             |                           |                             |                             |
|                                                                                                                       | <b>TWW group</b>          | <b>Intervention 2 group</b> | <b>Intervention 3 group</b> |
| <b>Referred for further investigations</b>                                                                            |                           |                             |                             |
| <b>Analysed</b><br>[If more than one follow-up, choose and specify the last one]                                      |                           |                             |                             |
| <b>Losses to follow-up/drop out/sample attrition</b><br>[If more than one follow-up, choose and specify the last one] |                           |                             |                             |
| <b>Interventions</b>                                                                                                  |                           |                             |                             |
|                                                                                                                       | <b>Description</b>        |                             |                             |
| TWW referral group                                                                                                    |                           |                             |                             |
| Intervention 2 group                                                                                                  |                           |                             |                             |
| Intervention 3 group                                                                                                  |                           |                             |                             |
| <b>Patient baseline characteristics</b>                                                                               |                           |                             |                             |
|                                                                                                                       | <b>TWW referral group</b> | <b>Intervention 2 group</b> | <b>Intervention 3 group</b> |
| <b>Age [years]</b><br>Mean [SD]                                                                                       |                           |                             |                             |
| <b>Sex –female n/N [%]</b>                                                                                            |                           |                             |                             |
| <b>BMI [kg/m<sup>2</sup>]</b><br>Mean [SD]                                                                            |                           |                             |                             |
| <b>Smoking n/N [%]</b>                                                                                                |                           |                             |                             |
| <b>Efficacy outcomes</b>                                                                                              |                           |                             |                             |
|                                                                                                                       |                           |                             |                             |

|                                           | <b>TWW referral group</b> | <b>Intervention 2 group</b> | <b>Intervention 3 group</b> | <b>Between-group difference p value [or 95% CI]*</b> |
|-------------------------------------------|---------------------------|-----------------------------|-----------------------------|------------------------------------------------------|
| <b>Primary Outcomes</b>                   |                           |                             |                             |                                                      |
| Diagnosed with CRC<br>% [n/N]             |                           |                             |                             |                                                      |
| CRC stage at diagnosis                    |                           |                             |                             |                                                      |
| Mortality from CRC                        |                           |                             |                             |                                                      |
|                                           |                           |                             |                             |                                                      |
| <b>Secondary outcomes</b>                 |                           |                             |                             |                                                      |
| Other diagnosis made                      |                           |                             |                             |                                                      |
| Adherence to diagnostic/treatment targets |                           |                             |                             |                                                      |
| <b>Authors conclusion</b>                 |                           |                             |                             |                                                      |
| <b>Reviewer's conclusion</b>              |                           |                             |                             |                                                      |
